# Supplementary material for: Detection of Transgenes in Local Maize Varieties of Small-Scale Farmers in Eastern Cape, South Africa
Source: PLOS journal article supplement (doi:10.1371/journal.pone.0116147), 2014-12-31
Supplement: S1 (10.1371/journal.pone.0116147.s001) [file journal.pone.0116147.s001]

## Supplementary Information S1

| Gardens | Maize variety                           | Origin of maize                                                                 | PCR results |      |        |        |       | Farmer activities |        | Comments                                                                                                                           |
|---------|-----------------------------------------|---------------------------------------------------------------------------------|-------------|------|--------|--------|-------|-------------------|--------|------------------------------------------------------------------------------------------------------------------------------------|
|         |                                         |                                                                                 | p35s        | zein | Cry1Ab | MON810 | NK603 | Recycles          | Shares |                                                                                                                                    |
| G1      | Xhosa White Maize                       | n.d.                                                                            | 0           | n/a  | n/a    | n/a    | n/a   | n.d.              | n.d.   |                                                                                                                                    |
| G2      | White Maize                             | Recycled                                                                        | 1           | +    | -      | -      | -     | Recycles          | n.d.   | Issues with DNA quality of 2nd and 3rd DNA extraction, probalby due to the poor condition of the leaf after transport and storage. |
| G3      | Xhosa White Maize                       | n.d.                                                                            | 0           | n/a  | n/a    | n/a    | n/a   | n.d.              | n.d.   |                                                                                                                                    |
| G4      | Xhosa White Maize                       | Recycled                                                                        | 0           | n/a  | n/a    | n/a    | n/a   | Recycles          | Shares |                                                                                                                                    |
| G5      | Xhosa White Maize (Silver King )        | Recycled                                                                        | 0           | n/a  | n/a    | n/a    | n/a   | Recycles          | Shares |                                                                                                                                    |
| G6      | Silver King and Red Maize               | Recycled                                                                        | 0           | n/a  | n/a    | n/a    | n/a   | Recycles          | Shares | Planted together in garden                                                                                                         |
| G7      | Red and White (local Silver King) Maize | Red maize is bought in the Agricultural Shop, while the White maize is recycled | 0           | n/a  | n/a    | n/a    | n/a   | Recycles          | Shares | Planted together in garden                                                                                                         |
| G8      | Xhosa White                             | n.d.                                                                            | 0           | n/a  | n/a    | n/a    | n/a   | n.d.              | n.d.   |                                                                                                                                    |
| G9      | McDonalds "Border King"                 | Agricultural Shop                                                               | 0           | n/a  | n/a    | n/a    | n/a   | No                | Shares | Same household as sample G10                                                                                                       |
| G10     | Xhosa Red                               | Recycled                                                                        | 0           | n/a  | n/a    | n/a    | n/a   | No                | Shares | Same household as sample G9                                                                                                        |
| G11     | Silver King (White Maize) and Xhosa Red | Recycled                                                                        | 0           | n/a  | n/a    | n/a    | n/a   | Recycles          | Shares |                                                                                                                                    |
| G12     | Xhosa White Maize                       | n.d.                                                                            | 0           | n/a  | n/a    | n/a    | n/a   | n.d.              | n.d.   |                                                                                                                                    |
| G13     | Red Maize                               | n.d.                                                                            | 0           | n/a  | n/a    | n/a    | n/a   | n.d.              | n.d.   |                                                                                                                                    |
| G14     | White Maize                             | Bought in the Agricultural Shop                                                 | 0           | n/a  | n/a    | n/a    | n/a   | n.d.              | n.d.   |                                                                                                                                    |

# Supplementary Information S1

**Table 1 Garden Samples** Overview of all garden sample sets, each sample set representing one garden and consisting of one leaf from 30 individual maize plants. The column ‘Maize variety’ gives the name that the farmers provided us with during the collection of the samples. The column ‘Origin of maize’ contains the information we were given on the origin of the plants, in cases where the maize was recycled we tried to get information on where the original seeds came from, however this proved difficult. Under PCR results, the p35s column indicates how many of the 30 leafs in the sample test were positive for p35s. Then follows a test for the maize reference gene *zein*, the insect resistant trait Cry1Ab, and the insect resistant event MON810 (Bt-maize). Lastly a test for the herbicide tolerant event NK603 (Roundup Ready) is given. Positive and negative results are indicated by + and -, respectively. Finally, information is given on whether the farmer participates in recycling or sharing of seeds (in the cases where this information was accessible).
